# Supplementary material
Source: MDPI journal article supplement (https://www.mdpi.com/2571-9408/3/2/32)
Supplement: s1 [file s1]

DSC /(μV/mg)

↑ exo

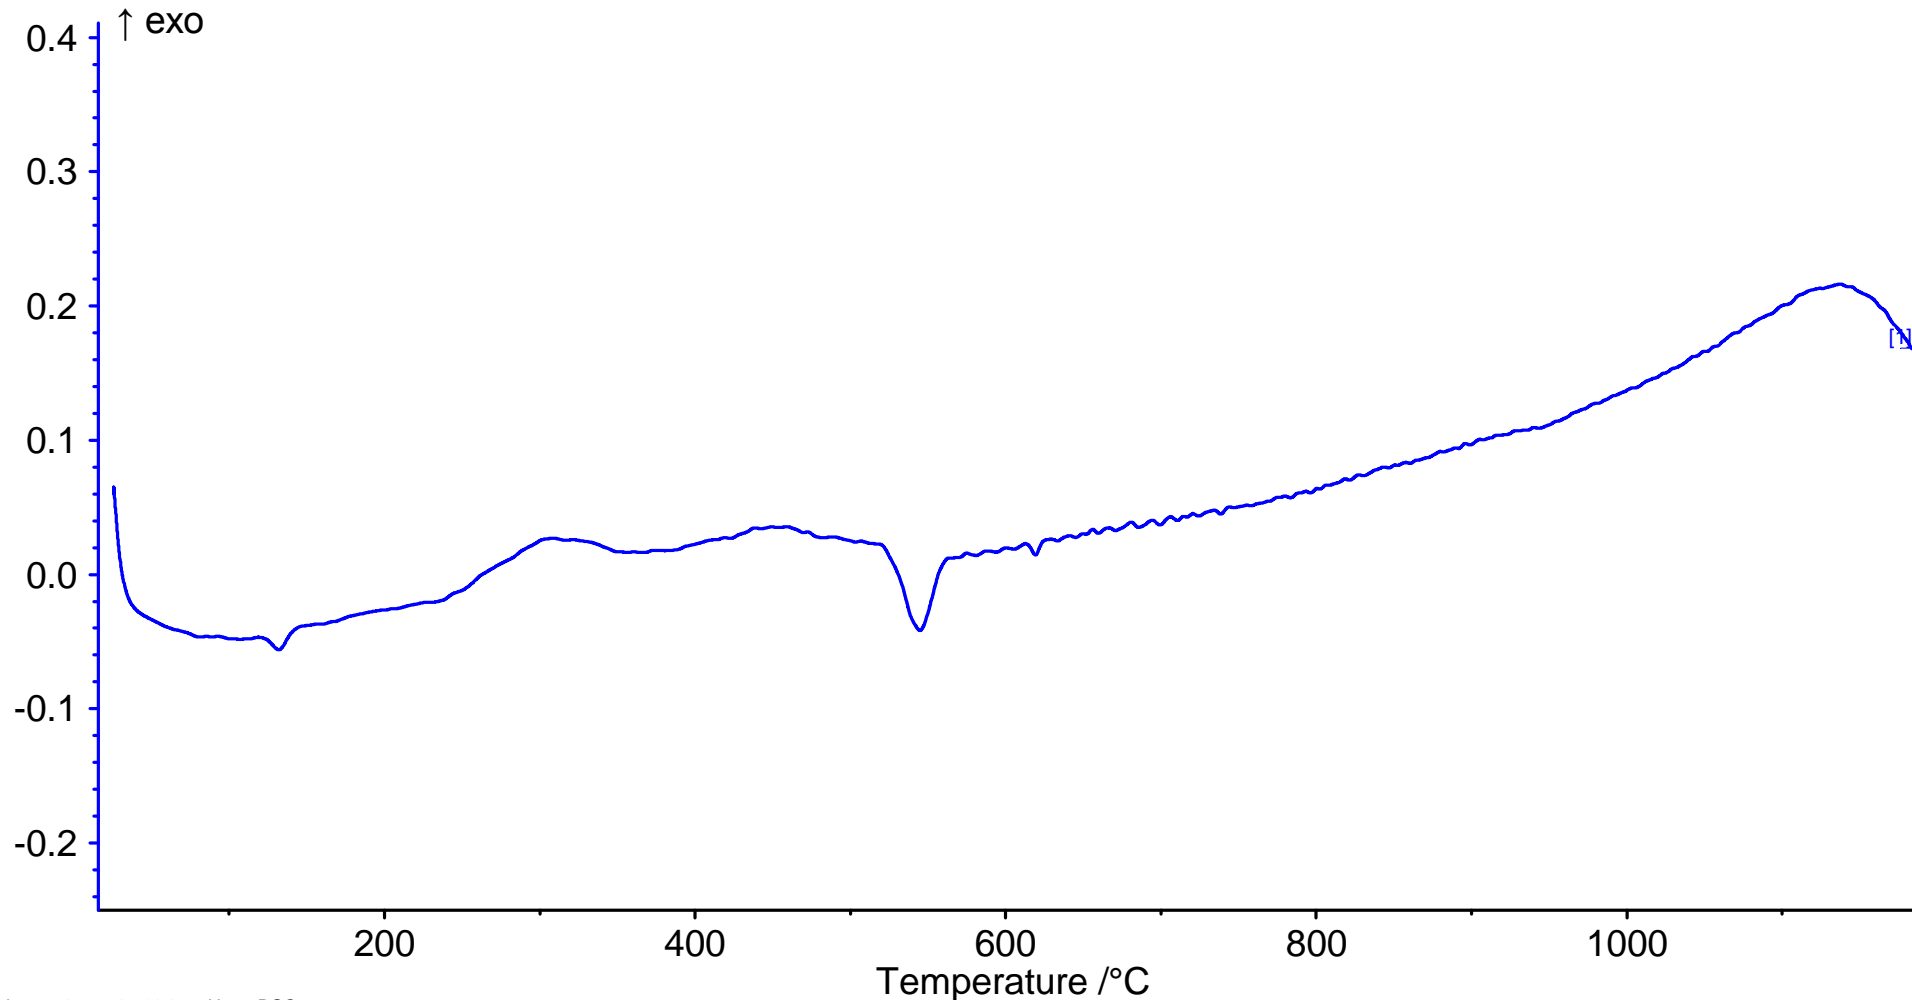

Main 2018-09-13 11:17 User: DSC

**Instrument :** NETZSCH DSC 404 **File :** C:\Misure\Leonelli\Boschetti\vetri antichi sett2018\No 071.ngb-dda **Remark :** vetri antichi

|                                                |                                                                        |                                                                |
|------------------------------------------------|------------------------------------------------------------------------|----------------------------------------------------------------|
| <b>Project :</b> Misura DTA                    | <b>Reference :</b> crogiolo Pt vuoto, 0 mg                             | <b>Mode/type of meas. :</b> DSC / sample with correction       |
| <b>Identity :</b> No 071                       | <b>Material :</b> vuoto                                                | <b>Segments :</b> 1/1                                          |
| <b>Date/time :</b> 13/09/2018 08:18:06         | <b>Corr./temp.cal :</b> taratura_10Cmin_ago2018.ngb-bda / TCALZERO.TMX | <b>Crucible :</b> DSC/TG pan Pt-Rh                             |
| <b>Laboratory :</b> Lab. Analisi Termiche DIF  | <b>Sens.file :</b> SENZERO.EXX                                         | <b>Atmosphere :</b> <no gas>/--- / <no gas>/--- / <no gas>/--- |
| <b>Operator :</b> Paola Miselli                | <b>Range :</b> 25°C/10.0(K/min)/1200°C                                 | <b>Corr/m. range :</b> 620/500 μV                              |
| <b>Sample :</b> Boschetti (Leonelli), 17.24 mg | <b>Sample car./TC :</b> DSC/(TG) HIGH RG 2 / S                         |                                                                |
