# Supplementary material
Source: MDPI journal article supplement (https://www.mdpi.com/2571-9408/3/2/32)
Supplement: s1 [file s1]

DSC /(μV/mg)

↑ exo

0.2

0.1

0.0

-0.1

-0.2

-0.3

200

400

600

800

1000

Temperature /°C

[1]

Main 2018-09-12 08:17 User: DSC

**Instrument :** NETZSCH DSC 404 **File :** C:\Misure\Leonelli\Boschetti\vetri antichi sett2018\No 099.ngb-dda **Remark :** vetri antichi

**Project :** Misura DTA

**Identity :** No 099

**Date/time :** 11/09/2018 16:08:41

**Laboratory :** Lab. Analisi Termiche DIEF

**Operator :** Paola Miselli

**Sample :** Boschetti (Leonelli), 18.39 mg

**Reference :** crogiolo Pt vuoto, 0 mg

**Material :** vuoto

**Corr./temp.cal :** taratura\_10Cmin\_ago2018.ngb-bda / TCALZERO.TMX

**Sens.file :** SENSZERO.EXX

**Range :** 25°C/10.0(K/min)/1200°C

**Sample car./TC :** DSC/(TG) HIGH RG 2 / S

**Mode/type of meas. :** DSC / sample with correction

**Segments :** 1/1

**Crucible :** DSC/TG pan Pt-Rh

**Atmosphere :** <no gas>/--- / <no gas>/--- / <no gas>/---

**Corr/m. range :** 620/500 μV
