# Supplementary material
Source: MDPI journal article supplement (https://www.mdpi.com/2571-9408/3/2/32)
Supplement: s1 [file s1]

DSC /(μV/mg)

↑ exo

0.2

0.1

0.0

-0.1

-0.2

200

400

600

800

1000

Temperature /°C

Main 2018-09-18 11:35 User: DSC

**Instrument :** NETZSCH DSC 404 **File :** C:\Misure\Leonelli\Boschetti\vetri antichi sett2018\No 106.ngb-dda **Remark :** vetri antichi

**Project :** Misura DTA  
**Identity :** No 106  
**Date/time :** 18/09/2018 08:01:51  
**Laboratory :** Lab. Analisi Termiche DIEF  
**Operator :** Paola Miselli  
**Sample :** Boschetti (Leonelli), 21.31 mg

**Reference :** crogiolo Pt vuoto, 0 mg  
**Material :** vuoto  
**Corr./temp.cal :** taratura\_10Cmin\_ago2018.ngb-bda / TCALZERO.TMX  
**Sens.file :** SENSZERO.EXX  
**Range :** 25°C/10.0(K/min)/1200°C  
**Sample car./TC :** DSC/(TG) HIGH RG 2 / S

**Mode/type of meas. :** DSC / sample with correction  
**Segments :** 1/1  
**Crucible :** DSC/TG pan Pt-Rh  
**Atmosphere :** <no gas>/--- / <no gas>/--- / <no gas>/---  
**Corr/m. range :** 620/500 μV

Created with NETZSCH Proteus software
